# Supplementary material
Source: publisher figshare collection journal article supplement (https://tandf.figshare.com/articles/dataset/_/16867488)
Supplement: Supplementary file 2 [file 1]

## Supplement 2 Additional Reference Material

- Aryal, N., Wood, J., Rijal, I., Deng, D.Y., Jha, M.K. and Ofori-Boadu, A. 2020. Fate of environmental pollutants: A review. *Water Environment Research*, 10.1002/wer.1404.
- Ateia, M., Alsbaiee, A., Karanfil, T. and Dichtel, W. 2019. Efficient PFAS removal by amine-functionalized sorbents: Critical review of the current literature. *Environmental Science & Technology Letters*, 6:688-695. 10.1021/acs.estlett.9b00659.
- Bartell, S.M. and Vieira, V.M. 2021. Critical review on PFOA, kidney cancer, and testicular cancer. *J. Air Waste Manage. Assoc.*, 71:663-679. 10.1080/10962247.2021.1909668.
- Blake, B.E. and Fenton, S.E. 2020. Early life exposure to per- and polyfluoroalkyl substances (PFAS) and latent health outcomes: A review including the placenta as a target tissue and possible driver of peri- and postnatal effects. *Toxicology*, 443:10.1016/j.tox.2020.152565.
- Buck, R.C., Franklin, J., Berger, U., Conder, J.M., Cousins, I.T., de Voogt, P., Jensen, A.A., Kannan, K., Mabury, S.A. and van Leeuwen, S.P.J. 2011. Perfluoroalkyl and polyfluoroalkyl substances in the environment: Terminology, classification, and origins. *Integrated Environmental Assessment and Management*, 7:513-541. doi.org/10.1002/ieam.258.
- Cao, H.M., Zhang, W.L., Wang, C.P. and Liang, Y.N. 2020. Sonochemical degradation of poly- and perfluoroalkyl substances - A review. *Ultrasonics Sonochemistry*, 69:10.1016/j.ultsonch.2020.105245.
- Chang, E.T., Adami, H.O., Boffetta, P., Wedner, H.J. and Mandel, J.S. 2016. A critical review of perfluorooctanoate and perfluorooctanesulfonate exposure and immunological health conditions in humans. *Critical Reviews in Toxicology*, 46:279-331. 10.3109/10408444.2015.1122573.
- Cousins, I.T., DeWitt, J.C., Gluge, J., Goldenman, G., Herzke, D., Lohmann, R., Miller, M., Ng, C.A., Scheringer, M., Vierke, L. and Wang, Z.Y. 2020. Strategies for grouping per- and polyfluoroalkyl substances (PFAS) to protect human and environmental health. *Environmental Science-Processes & Impacts*, 22:1444-1460. 10.1039/d0em00147c.
- Cui, D.N., Li, X.R. and Quinete, N. 2020. Occurrence, fate, sources and toxicity of PFAS: What we know so far in Florida and major gaps. *Trac-Trends in Analytical Chemistry*, 130:10.1016/j.trac.2020.115976.
- Domingo, J.L. and Nadal, M. 2019. Human exposure to per-and polyfluoroalkyl substances (PFAS) through drinking water: A review of the recent scientific literature. *Environmental Research*, 177:10.1016/j.envres.2019.108648.
- Eichler, C.M.A. and Little, J.C.C. 2020. A framework to model exposure to per- and polyfluoroalkyl substances in indoor environments. *Environmental Science-Processes & Impacts*, 22:500-511. 10.1039/c9em00556k.
- Houde, M., De Silva, A.O., Muir, D.C.G. and Letcher, R.J. 2011. Monitoring of perfluorinated compounds in aquatic biota: An updated review PFCs in aquatic biota. *Environ. Sci. Technol.*, 45:7962-7973. 10.1021/es104326w.
- Jiao, X.C., Shi, Q.Y. and Gan, J. 2020. Uptake, accumulation and metabolism of PFASs in plants and health perspectives: A critical review. *Critical Reviews in Environmental Science and Technology*, 10.1080/10643389.2020.1809219.
- Joudan, S., Liu, R.Z., D'Eon, J.C. and Mabury, S.A. 2020. Unique analytical considerations for laboratory studies identifying metabolic products of per- and polyfluoroalkyl substances (PFASs). *Trac-Trends in Analytical Chemistry*, 124:10.1016/j.trac.2019.02.032.
- Kim, S.K., Khim, J.S., Lee, K.T., Giesy, J.P., Kannan, K., Lee, D.S. and Koh, C.H. 2007. Emission, contamination and exposure, fate and transport, and national management strategy of persistent organic pollutants in South Korea, Li, A., Tanabe, S., Jiang, G., Giesy, J.P. and Lam, P.K.S. (Eds.), *Persistent Organic Pollutants in Asia: Sources, Distributions, Transport and Fate*, 31-157.
- Kucharzyk, K.H., Darlington, R., Benotti, M., Deeb, R. and Hawley, E. 2017. Novel treatment technologies for PFAS compounds: A critical review. *Journal of Environmental Management*, 204:757-764. 10.1016/j.jenvman.2017.08.016.
- Liu, Y.N., D'Agostino, L.A., Qu, G.B., Jiang, G.B. and Martin, J.W. 2019. High-resolution mass spectrometry (HRMS) methods for nontarget discovery and characterization of poly- and per-fluoroalkyl substances (PFASs) in environmental and human samples. *Trac-Trends in Analytical Chemistry*, 121:10.1016/j.trac.2019.02.021.
- Lu, D.N., Sha, S., Luo, J.Y., Huang, Z.R. and Jackie, X.Z. 2020. Treatment train approaches for the remediation of per- and polyfluoroalkyl substances (PFAS): A critical review. *Journal of Hazardous Materials*,

- 386:10.1016/j.jhazmat.2019.121963.
- Mahinroosta, R. and Senevirathna, L. 2020. A review of the emerging treatment technologies for PFAS contaminated soils. *Journal of Environmental Management*, 255:10.1016/j.jenvman.2019.109896.
- Menger, R.F., Funk, E., Henry, C.S. and Borch, T. 2021. Sensors for detecting per- and polyfluoroalkyl substances (PFAS): A critical review of development challenges, current sensors, and commercialization obstacles. *Chemical Engineering Journal*, 417:10.1016/j.cej.2021.129133.
- Mullin, L., Katz, D.R., Riddell, N., Plumb, R., Burgess, J.A., Yeung, L.W.Y. and Jogsten, I.E. 2019. Analysis of hexafluoropropylene oxide-dimer acid (HFPO-DA) by liquid chromatography-mass spectrometry (LC-MS): Review of current approaches and environmental levels. *Trac-Trends in Analytical Chemistry*, 118:828-839. 10.1016/j.trac.2019.05.015.
- Nadal, M. and Domingo, J.L. 2014. Indoor dust levels of Perfluoroalkyl Substances (PFASs) and the role of ingestion as an exposure pathway: A review. *Current Organic Chemistry*, 18:2200-2208. 10.2174/1385272819666140804230713.
- Nakayama, S.F., Yoshikane, M., Onoda, Y., Nishihama, Y., Iwai-Shimada, M., Takagi, M., Kobayashi, Y. and Isobe, T. 2019. Worldwide trends in tracing poly- and perfluoroalkyl substances (PFAS) in the environment. *Trac-Trends in Analytical Chemistry*, 121:10.1016/j.trac.2019.02.011.
- Nzeribe, N., Crimi, M., Thagard, S.M. and Holsen, T.M. 2019. Physico-chemical processes for the treatment of per- and polyfluoroalkyl substances (PFAS): A review blossom. *Critical Reviews in Environmental Science and Technology*, 49:866-915. 10.1080/10643389.2018.1542916.
- Ojo, A.F., Peng, C. and Ng, J.C. 2021. Assessing the human health risks of per- and polyfluoroalkyl substances: A need for greater focus on their interactions as mixtures. *Journal of Hazardous Materials*, 407:10.1016/j.jhazmat.2020.124863.
- Olsen, G.W. 2015. PFAS biomonitoring in higher exposed populations, DeWitt, J.C. (Ed.) *Toxicological Effects of Perfluoroalkyl and Polyfluoroalkyl Substances*, 77-125.
- Pelch, K.E., Reade, A., Wolffe, T.A.M. and Kwiatkowski, C.F. 2019. PFAS health effects database: Protocol for a systematic evidence map. *Environ. Intl.*, 130:10.1016/j.envint.2019.05.045.
- Petersen, K.U., Larsen, J.R., Deen, L., Flachs, E.M., Haervig, K.K., Hull, S.D., Bonde, J.P.E. and Tottenborg, S.S. 2020. Per- and polyfluoroalkyl substances and male reproductive health: a systematic review of the epidemiological evidence. *Journal of Toxicology and Environmental Health-Part B-Critical Reviews*, 23:276-291. 10.1080/10937404.2020.1798315.
- Point, A.D., Holsen, T.M., Fernando, S., Hopke, P.K. and Crimmins, B.S. 2019. Towards the development of a standardized method for extraction and analysis of PFAS in biological tissues. *Environmental Science-Water Research & Technology*, 5:1876-1886. 10.1039/c9ew00765b.
- Rice, P.A., Cooper, J., Koh-Fallet, S.E. and Kabadi, S.V. 2021. Comparative analysis of the physicochemical, toxicokinetic, and toxicological properties of ether-PFAS. *Toxicology and Applied Pharmacology*, 422:10.1016/j.taap.2021.115531.
- Rodriguez, K.L., Hwang, J.H., Esfahani, A.R., Sadmani, A. and Lee, W.H. 2020. Recent developments of PFAS-detecting sensors and future direction: A review. *Micromachines*, 11:10.3390/mi11070667.
- Schulz, K., Silva, M.R. and Klaper, R. 2020. Distribution and effects of branched versus linear isomers of PFOA, PFOS, and PFHxS: A review of recent literature. *Sci. Total Environ*, 733:10.1016/j.scitotenv.2020.139186.
- Sinclair, G.M., Long, S.M. and Jones, O.A.H. 2020. What are the effects of PFAS exposure at environmentally relevant concentrations? *Chemosphere*, 258:10.1016/j.chemosphere.2020.127340.
- Steenland, K. and Winquist, A. 2021. PFAS and cancer, a scoping review of the epidemiologic evidence. *Environmental Research*, 194:110690. 10.1016/j.envres.2020.110690.
- Steenland, K. and Winquist, A. 2021. PFAS and cancer, a scoping review of the epidemiologic evidence. *Environmental Research*, 194:10.1016/j.envres.2020.110690.
- Sunderland, E.M., Hu, X.D.C., Dassuncao, C., Tokranov, A.K., Wagner, C.C. and Allen, J.G. 2019. A review of the pathways of human exposure to poly- and perfluoroalkyl substances (PFASs) and present understanding of health effects. *Journal of Exposure Science and Environmental Epidemiology*, 29:131-147. 10.1038/s41370-018-0094-1.
- Szilagyi, J.T., Avula, V. and Fry, R.C. 2020. Perfluoroalkyl Substances (PFAS) and their effects on the placenta, pregnancy, and child development: A potential mechanistic role for placental Peroxisome Proliferator-Activated Receptors (PPARs). *Current Environmental Health Reports*, 7:222-230. 10.1007/s40572-020-00279-0.
- Trojanowicz, M. and Koc, M. 2013. Recent developments in methods for analysis of perfluorinated persistent pollutants. *Microchimica Acta*, 180:957-971.

- Vu, C.T. and Wu, T.T. 2020. Recent progress in adsorptive removal of per- and poly-fluoroalkyl substances (PFAS) from water/wastewater. *Critical Reviews in Environmental Science and Technology*, 10.1080/10643389.2020.1816125.
- Wanninayake, D.M. 2021. Comparison of currently available PFAS remediation technologies in water: A review. *Journal of Environmental Management*, 283:10.1016/j.jenvman.2021.111977.
